# Supplementary material
Source: PubMed Central journal article supplement (PMC7390703)

## Article Search Parameters

The Cochrane Library was searched from inception to June 2019 performing a Title Abstract Keyword query using these terms: heuristic\* AND bias AND diagnostic error (n=6); surgical decision-making AND bias AND error (n=8); clinical decision-support AND method AND surgical decision-making (n=27); decision tree AND surgical decision-making (n=12); reinforcement learning AND medical decision-making (n=11)

EMBASE was searched from inception to June 2019 using these terms: heuristic AND bias AND 'diagnostic error' AND [embase]/lim AND [english]/lim AND ([article]/lim OR [review]/lim) (n=10); 'surgical decision-making' AND bias AND [embase]/lim AND [english]/lim AND ([article]/lim OR [review]/lim) (n=9); 'clinical decision-support' AND method AND surgery AND [embase]/lim AND [english]/lim AND ([article]/lim OR [review]/lim) (n=31); ('decision tree' OR 'decision curve') AND 'surgical decision-making' AND [embase]/lim AND [english]/lim AND ([article]/lim OR [review]/lim) (n=8); 'reinforcement learning' AND 'artificial intelligence' AND 'decision-making' AND [embase]/lim AND [english]/lim AND ([article]/lim OR [review]/lim) (n=19)

PubMed was searched from inception to June 2019 using these terms: heuristic\*[tw] AND bias[tw] AND diagnostic error[tw] (n=11); surgical decision-making[tw] AND bias[tw] (n=23); clinical decision-support[tw] AND method[tw] AND surgery[tw] (n=12); decision tree OR decision curve[tw] AND surgical decision-making[tw] (n=22); reinforcement learning[tw] AND artificial intelligence[tw] AND decision-making[tw] (n=21)

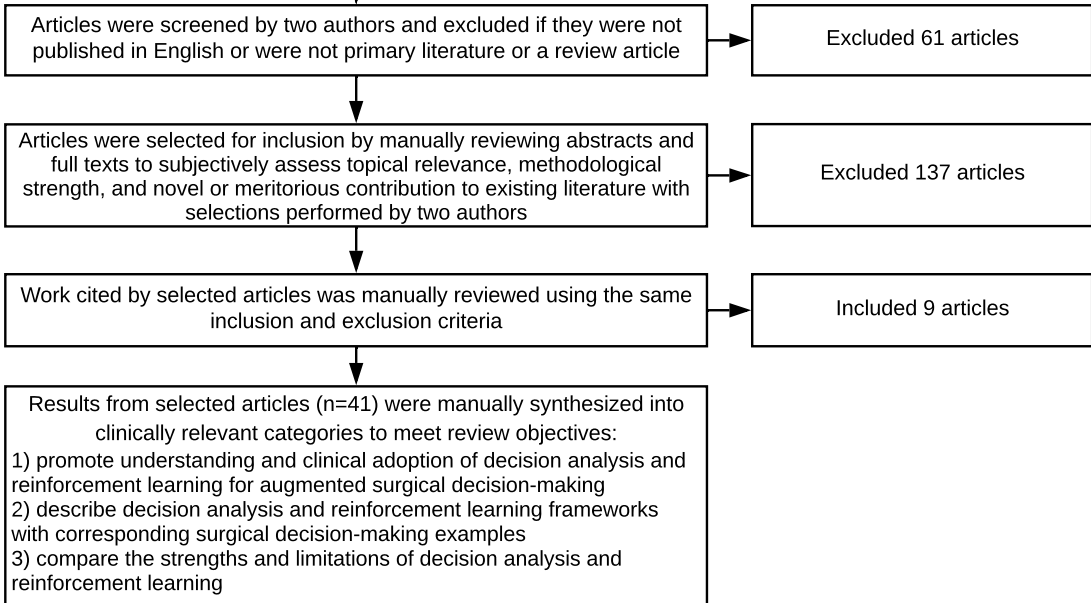

Supplement: NIHMS1605711-supplement-1.pdf [file NIHMS1605711-supplement-1.pdf]
